# Supplementary material
Source: publisher figshare collection journal article supplement (https://tandf.figshare.com/ndownloader/files/22864280)
Supplement: Supplementary file 1 [file 22864280]

**Supporting information**

for

**Synthesis of fluorine-containing prenylated benzophenones**

Vuyisa Mzozoyana and Fanie R. van Heerden

School of Chemistry and Physics, University of KwaZulu Natal, Private Bag X01, Scottsville 3209, Pietermaritzburg, South Africa

Tel.: +27 31 260 7000; e-mail: [mzozoyanav@ukzn.ac.za](mailto:mzozoyanav@ukzn.ac.za)

**Table of content:**

Experimental ii

General ii

Synthesis iii

1H and 13C NMR spectra of compounds **7a-d** xviii

1H and 13C NMR spectra of compounds **8a-d**  xxi

1H and 13C NMR spectra of compounds **9a-d** xxiv

1H and 13C NMR spectra of compounds **10c-d** xxvii

1H and 13C NMR spectra of compounds **11c-d** and **12c-d** xxix

1H and 13C NMR spectra of compounds **11d'** xxxiii

1H and 13C NMR spectra of compounds **12d'** xxxiv

1H and 13C NMR spectra of compounds **13c-d** and **14c-d** xxxv

1H and 13C NMR spectra of compounds **13d'** xxxix

1H and 13C NMR spectra of compounds **14d'** xI

**EXPERIMENTAL**

**1.** **General**

Qualitative thin-layer chromatography (TLC) was used to monitor reactions. TLC plates (Merck Kieselgel 60254 aluminum backed) were bought ready for use. Visualization of the TLC plates was achieved using an iodine tank and/or fluorescence on exposure to short wavelength ultraviolet light (254 nm). For purification, centrifugal chromatography was conducted on a Harrison Research Chromatotron model 7924T on glass plates coated with Merck silica gel (particle size 0.040 - 0.063 mm), 1 - 4 mm thick.

Melting points (Mp) were determined using a Stuart melting point apparatus with open-ended capillary tubes and are uncorrected. Nuclear magnetic resonance (NMR) spectra were recorded on a Bruker 400 MHz UltraShield spectrometer at frequencies of 399.995 MHz and 100.4296 MHz for proton (1H) and carbon (13C), respectively. Infrared (IR) spectra were recorded on a Perkin Elmer spectrometer (FTIR Spectrum 100) as neat solid or liquid samples. High-resolution mass spectrometry (HRMS) was performed on a Waters LCT Premier time-of-flight mass spectrometer.

**2.** **Synthesis**

2.1. *1,3,5-Trimethoxybenzene**(****2****)*. A mixture of phloroglucinol (1.0 g, 7.9 mmol), iodomethane (3.4g, 24.0 mmol), and anhydrous K2CO3 (3.3 g, 24.0 mmol) in acetone (70 mL) was refluxed for 3 h. The resulting mixture was cooled to room temperature and filtered through celite. The solvent was removed *in vacuo*. The crude mixture was purified by silica gel column chromatography with 20% EtOAc in hexanes as eluent. The solvent was removed under reduced pressure to yield a colourless solid (1.03 g, 7.8 mmol, 99%). After recrystallization (Hexanes-EtOAc, 1:1), **2** was obtained as colourless crystals, mp 53-54 ºC; TLC Rf 0.26 (Hexanes-EtOAc, 4:1); 1H NMR (400 MHz, CDCl3): *δ* 3.75 (9H, s), 6.08 (3H, s). 13C NMR (100 MHz, CDCl3): *δ* 55.4, 93.1, 161.7.

**2.2. Synthesis of trimethoxyphenoyl benzene 4a-d**

2.2.1. *Phenyl(2,4,6-trimethoxyphenyl)methanone (****4a****)*. Benzoyl chloride (1.1 g, 7.8 mmol) was added dropwise to an ice-cooled stirred mixture of AlCl3 (1.0 g, 7.8 mmol) in DCM (20 mL). After being stirred at 0 ºC for 1 h, the reaction mixture was added slowly to a solution of 1,3,5-trimethoxybenzene (0.5 g, 7.8 mmol) in DCM (15 mL) at 0 ºC. The reaction mixture was allowed to reach room temperature and stirred for a further 12 h. An ice-cooled 6 M HCl (20 mL) was poured slowly into the reaction mixture and DCM (20 mL) was also added into the mixture. The organic layer was separated and washed with saturated NaHCO3 solution (15 mL), water (20 mL) and brine (15 mL) and dried over anhydrous MgSO4. The solvent was removed *in vacuo*. The resulting product was purified by silica gel column chromatography (hexanes-EtOAc, 7:3) to give **4a** as a white solid (1.9 g, 7.0 mmol, 90%). After recrystallization (Hexanes-EtOAc, 9:1), **4a** was obtained as colourless crystals, mp 113-115 ºC (lit.[12] 113-114 °C); TLC Rf 0.35 (Hexanes-EtOAc, 7:3); 1H NMR (400 MHz, CDCl3): *δ* 3.66 (6H, s), 3.84 (3H, s), 6.16 (2H, s), 7.39 (2H, t, *J*= 7.9 Hz), 7.50 (1H, tt, *J* = 7.9, 1.3 Hz), 7.82 (2H, dd, *J* = 7.9, 1.3 Hz). 13C NMR (100 MHz, CDCl3): *δ* 55.7, 56.1 (2x), 91.0 (2x), 111.3, 128.5 (2x), 129.6 (2x), 133.1, 138.5, 159.0 (2x), 162.7, 195.2; HRMS (ESI+): Found [M+Na]+ 295.0945, Calc. for C16H16NaO4 295.0946; IR (neat) *ν*max (cm-1) 3053, 2949, 1660, 1599, 1583, 1453, 1123.

2.2.2. *(2-fluorophenyl)(2,4,6-trimethoxyphenyl)methanone (****4b****)*. Yield=94%; colourless crystals, mp 127-129 ºC; TLC Rf 0.41 (Hexanes-EtOAc, 7:3); 1H NMR (400 MHz, CDCl3): *δ* 3.67 (6H, s), 3.83 (3H, s), 6.12 (2H, s), 7.01 (1H, dd, *J* = 11.4, 8.5), 7.15 (1H, t, *J* = 7.7), 7.43 (1H, m), 7.75 (1H, dd, *J* = 7.7, 7.6). 13C NMR (100 MHz, CDCl3): *δ* 55.4, 55.9 (2x), 90.8 (2x), 113.1, 116.3 (d, *J* = 22.8), 123.8 (d, *J* = 2.9), 127.9 (d, *J* = 9.5), 131.4 (d, *J* = 1.4), 133.8 (d, *J* = 9.1), 159.1 (2x), 161.7 (d, *J* = 256.5), 162.7, 190.7; HRMS (ESI+): Found [M+Na]+ 313.0849,Calc. for C16H15FNaO4 313.0852; IR (neat) *ν*max (cm-1) 3010, 2949, 1651, 1603, 1583, 1451, 1122.

2.2.3. *(3-fluorophenyl)(2,4,6-trimethoxyphenyl)methanone (****4c****)*. Yield=95%; colourless crystals, mp 107-109 °C; TLC Rf 0.42 (Hexanes-EtOAc, 7:3); 1H NMR (400 MHz, CDCl3): *δ* 3.69 (6H, s), 3.86 (3H, s), 6.17 (2H, s), 7.21 (1H, td, *J* = 8.2, 2.8), 7.37 (1H, m), 7.51 (1H, dt, *J* = 9.3, 1.8), 7.60 (1H, dt, *J* = 8.2, 1.8). 13C NMR (100 MHz, CDCl3): *δ* 55.5, 55.8 (2x), 90.8 (2x), 110.4, 115.9 (d, *J* = 22.4), 119.7 (d, *J* = 21.5), 125.1 (d, *J* = 2.8), 129.8 (d, *J* = 7.5), 140.6 (d, *J*= 6.2), 158.9 (2x), 162.7, 162.8 (d, *J* = 246.6), 193.6; HRMS (ESI+): Found [M+Na]+ 313.0849, Calc. for C16H15FNaO4 313.0852; IR (neat) *ν*max (cm-1) 2947, 2841, 1676, 1583, 1267.

2.2.4. *(4-fluorophenyl)(2,4,6-trimethoxyphenyl)methanone (****4d****)*. Yield=95%; colourless crystals, mp 155-157 ºC; TLC Rf 0.42 (Hexanes-EtOAc, 7:3); 1H NMR (400 MHz, CDCl3): *δ* 3.69 (6H, s), 3.86 (3H, s), 6.17 (2H, s), 7.07 (2H, dd, *J* = 9.2, 8.6), 7.85 (2H, dd, *J* = 8.6, 5.7). 13C NMR (100 MHz, CDCl3): *δ* 55.5, 55.8 (2x), 90.8 (2x), 110.7, 115.3 (d, *J* = 22.0, 2x), 132.0 (d, *J* = 9.4, 2x), 134.9, 158.7 (2x), 162.6, 165.8 (d, *J* = 254.8), 193.3; HRMS (ESI+): Found [M+Na]+ 313.0849, Calc. for C16H15FNaO4 313.0852; IR (neat) *ν*max (cm-1) 3001, 2943, 1658, 1593, 1504, 1272.

**2.3. Synthesis of trihydroxyphenoyl benzene 5a-d**

2.3.1. *Phenyl(2,4,6-trihydroxyphenyl)methanone (****5a****)*. To a stirring solution of phenyl(2,4,6-trimethoxyphenyl)methanone (1.6 g, 6.0 mmol) in DCM (30 ml) at -78 ºC was added boron tribromide (3 ml). The temperature of the reaction mixture was allowed to reach the room temperature slowly. After being stirred for 24 h at room temperature, the reaction mixture was cooled to 0 ºC and quenched with water. DCM (15 ml) was added into a stirring mixture. A clear liquid was decanted off the mixture and the residue was washed with EtOAc. The organic layer was dried over anhydrous MgSO4 and the solvent was removed *in vacuo*. The resulting yellow product was purified by silica gel column chromatography with 40% EtOAc in hexanes as eluent and **5a** was obtained a light yellow crystalline solid (1.4 g, 5.9 mmol, 99%), mp 168-170ºC (lit.[9] 168-170 °C); TLC Rf 0.52 (Hexanes-EtOAc, 3:2); 1H NMR (400 MHz, DMSO-d6): *δ* 5.84 (2H, s), 7.43 (2H, t, *J*= 7.9), 7.53 (1H, tt, *J* = 7.9, 1.3), 7.62 (2H, dd, *J*= 7.9, 1.3), 9.82 (1H, bs), 10.08 (2H, bs). 13C NMR (100 MHz, DMSO-d6): *δ* 94.8 (2x), 106.0, 128.6 (2x), 128.9 (2x), 132.1, 140.2, 159.8 (2x), 162.3, 196.9; HRMS (ESI-): Found [M-H]- 229.0497, Calc. for C13H9O4 229.0501; IR (neat) *ν*max (cm-1): 3621, 1625, 1598, 1543, 1319.

2.3.2. *(2-fluorophenyl)(2,4,6-trihydroxyphenyl) methanone (****5b****)*. Yield=98%; yellow crystalline solid, mp 125-128 ºC; TLC Rf 0.49 (Hexanes-EtOAc, 3:2); 1H NMR (400 MHz, DMSO-d6): *δ* 5.78 (2H, s), 7.15-7.25 (2H, m), 7.38 (1H, t, *J*= *7*.5), 7.46 (1H, m), 10.52 (1H, bs), 11.47 (2H, bs). 13C NMR (100 MHz, DMSO-d6): *δ* 94.7 (2x), 105.0, 115.5 (d, *J* = 21.4), 124.5 (d, *J* = 8.3), 128.9 (d, *J* = 3.5), 131.5 (d, *J* = 16.2), 131.7 (d, *J* = 8.3), 158.8 (d, *J* = 248.0), 163.9 (2x), 166.1, 193.9; HRMS (ESI-): Found [M-H]- 247.0405, Calc. for C13H8FO4 247.0407; IR (neat) *ν*max (cm-1): 3598, 1627, 1596, 1514, 1309.

2.3.3. *(3-fluorophenyl)(2,4,6-trihydroxyphenyl) methanone (****5c****)*. Yield=98%; yellow crystalline solid, mp 172-174ºC; TLC Rf 0.49 (Hexanes-EtOAc, 3:2); 1H NMR (400 MHz, DMSO-d6): *δ* 5.84 (2H, s), 7.29-7.53 (4H, m), 9.92 (1H, bs), 10.22 (2H, bs). 13C NMR (100 MHz, DMSO-d6): *δ* 94.7 (2x), 105.4, 114.9 (d, *J* = 22.0), 118.8 (d, *J* = 21.4), 124.9 (d, *J* = 2.6), 130.6 (d, *J* = 7.9), 142.9 (d, *J* = 6.5), 160.0 (2x), 162.3 (d, *J*= 244.0), 162.7, 195.3; HRMS (ESI-): Found [M-H]- 247.0406, Calc. for C13H8FO4 247.0407; IR (neat) *ν*max (cm-1): 3419, 1635, 1596, 1513, 1300.

2.3.4. *(4-fluorophenyl)(2,4,6-trihydroxyphenyl) methanone (****5d****)*. Yield=98%; yellow crystalline solid, mp 166-168 ºC; TLC Rf 0.49 (Hexanes-EtOAc, 3:2); 1H NMR (400 MHz, DMSO-d6): *δ* 5.85 (2H, s), 7.26 (2H, m),7.69 (2H, m), 9.82 (1H, bs), 10.04 (2H, bs). 13C NMR (100 MHz, DMSO-d6): *δ* 94.9 (2x), 106.0, 115.4 (d, *J* = 22.0, 2x), 131.7 (d, *J* = 9.3, 2x), 136.8 (d, *J* = 2.7), 159.6 (2x), 162.3, 164.7 (d, *J* = 249.7), 195.3; HRMS (ESI-): Found [M-H]- 247.0409, Calc. for C13H8FO4 247.0407; IR (neat) *ν*max (cm-1): 3556, 1641, 1595, 1506, 1288.

**2.4. Synthesis of of mono-*C*-prenylated benzophenones 7a-d and 8a-d**

2.4.1 *Phenyl[2,4,6-trihydroxy-3-(3-methyl-2-butenyl)phenyl] methanone (****7a****)*. To a mixture of phenyl(2,4,6-trihydroxyphenyl)methanone (0.276 g, 1.2 mmol) and DBU (0.183 g, 1.2 mmol) in dry THF (15 ml) was added a prenyl bromide (0.179 g, 1.2 mmol) in small increments. The mixture was stirred at room temperature for 24 h. After addition of 2 M HCl (30 ml), the mixture was stirred for a further 15 min and extracted with EtOAc (4 x 20 ml), washed with brine (30 ml) and dried over anhydrous MgSO4. The removal of the solvent *in vavuo* resulted in a light orange product. After purification by the silica gel column chromatography (Hexanes-EtOAc, 4:1), **7a** was obtained as a light orange semisolid (0.222 g, 0.744 mmol, 62%); TLC Rf 0.54 (Hexanes-EtOAc, 4:1); 1H NMR (400 MHz, CDCl3): *δ* 1.76 (3H, d, *J* = 1.1), 1.80 (3H, s), 3.36 (2H, d, *J* = 7.0), 5.26 (1H, m), 5.93 (2H, s), 6.15 (1H, bs), 7.51 (2H, dd, *J* = 8.1, 7.5), 7.58 (1H, tt, *J* = 7.5, 1.5), 7.64 (2H, dd, *J* = 8.1,1.5), 10.29 (1H, bs). 13C NMR (100 MHz, CDCl3): *δ* 17.9, 21.7, 25.8, 96.2, 104.6, 106.6, 121.6, 127.8 (2x), 129.2 (2x), 132.2, 135.4, 140.0, 159.4, 160.8, 162.6, 197.7; HRMS (ESI-): Found [M-H]- 297.1130, Calc. for C18H17O4 297.1127; IR (neat) *ν*max (cm-1): 3523, 3023, 2953, 1652, 1594, 1577, 1420, 1111.

2.4.2. *(3-fluorophenyl)[2,4,6-trihydroxy-3-(3-methyl-2-butenyl)phenyl]methanone (****7c****).* Yield=61%; light orange semisolid; TLC Rf 0.53 (Hexanes-EtOAc, 4:1); 1H NMR (400 MHz, CDCl3): *δ* 1.76 (3H, d, *J*= 1.1), 1.80 (3H, s), 3.36 (2H, d, *J* = 7.1), 5.25 (1H, m), 5.91 (1H, s), 7.24 (1H, t, *J* = 8.1), 7.32 (1H, m), 7.38-7.48 (2H, m), 10.16 (1H, bs). 13C NMR (100 MHz, CDCl3): *δ* 17.9, 21.7, 25.8, 96.2, 104.5, 106.5, 115.1 (d, *J* = 22.9), 118.7 (d, *J* = 21.1), 121.3, 130.4 (d, *J* = 7.6), 130.4 (d, *J* = 7.6), 135.9, 142.5 (d, *J* = 6.6), 159.2, 160.9, 162.5, 162.6 (d, *J* = 249.2), 196.6; HRMS (ESI+): Found [M+Na]+ 339.1003, Calc. for C18H17FNaO4 339.1009; IR (neat) *ν*max (cm-1): 3507, 3061, 2925, 1663, 1594, 1572, 1446, 1112.

2.4.3. *(4-fluorophenyl)[2,4,6-trihydroxy-3-(3-methyl-2-butenyl)phenyl]methanone (****7d****)*. Yield=62%; light orange semisolid; TLC Rf 0.53 (Hexanes-EtOAc, 4:1); 1H NMR (400 MHz, CDCl3): *δ* 1.76 (3H, d, *J* = 1.1), 1.80 (3H, s), 3.36 (2H, d, *J* = 7.1), 5.25 (1H, m), 5.92 (1H, s), 6.22 (1H, bs), 7.14 (2H, m), 6.50 (1H, bs), 7.67 (2H, m), 10.03 (1H, bs). 13C NMR (100 MHz, CDCl3): *δ* 17.9, 21.7, 25.8, 96.1, 104.6, 106.5, 115.8 (d, *J* = 21.9, 2x), 121.4, 130.9 (d, *J* = 9.0, 2x), 135.7, 136.4 (d, *J* = 3.1), 160.0, 160.6, 162.2, 165.0 (d, *J* = 253.6), 196.6; HRMS (ESI-): Found [M-H]- 315.1035, Calc. for C18H16FO4 315.1033; IR (neat) *ν*max (cm-1): 3559, 3055, 2952, 1663, 1596, 1587, 1450, 1143.

2.4.4. *Phenyl[3-(3,7-dimethyl-2,6-octadienyl)-2,4,6-trihydroxyphenyl]methanone (****8a****)*. Yield=42%; light orange semisolid; TLC Rf 0.66 (Hexanes-EtOAc, 4:1); 1H NMR (400 MHz, CDCl3): *δ* 1.59 (3H, d, *J* = 1.1), 1.66 (3H, s), 1.79 (3H, s), 2.02-2.16 (4H, m), 3.37 (2H, d, *J* = 7.0), 5.05 (1H, t, *J* = 6.6), 5.27 (1H, t, *J* = 6.8), 5.93 (1H, s), 6.27 (1H, bs), 7.47-7.66 (5H, m), 10.28 (1H, bs). 13C NMR (100 MHz, CDCl3): *δ* 16.2, 17.7, 21.7, 25.7, 26.3, 39.7, 96.3, 104.6, 106.5, 121.5, 123.7, 127.8 (2x), 129.1 (2x), 123.1, 132.2, 139.3, 140.1, 159.4, 160.8, 162.6, 197.8; HRMS (ESI+): Found [M+Na]+ 389.1721, Calc. for C23H26NaO4 389.1729; IR (neat) *ν*max (cm-1): 3533, 3073, 2943, 1656, 1595, 1569, 1444, 1161.

2.4.5. *(3-fluorophenyl)[3-(3,7-dimethyl-2,6-octadienyl)-2,4,6-trihydroxyphenyl]methanone (****8c****)*. Yield=40%; light orange semisolid; TLC Rf 0.65 (Hexanes-EtOAc, 4:1); 1H NMR (400 MHz, CDCl3): *δ* 1.58 (3H, s), 1.65 (3H, s), 1.79 (3H, s), 2.02-2.16 (4H, m), 3.38 (2H, d, *J* = 7.2), 5.04 (1H, t, *J* = 6.8), 5.26 (1H, t, *J* = 6.9), 5.92 (1H, s), 6.24 (1H, bs), 7.23 (1H, t, *J* = 8.2), 7.32 (1H, m), 7.38-7.48 (2H, m), 7.54 (1H, bs), 10.13 (1H, bs). 13C NMR (100 MHz, CDCl3): *δ* 16.2, 17.7, 21.7, 25.6, 26.2, 39.7, 96.2, 104.5, 106.4, 115.1 (d, *J* = 22.8), 118.7 (d, *J* = 21.2), 121.2, 123.5 (d, *J* = 3.0), 123.6, 130.3 (d, *J* = 7.9), 130.5, 139.9, 142.6 (d, *J* = 6.6), 159.3, 160.9, 162.7, 162.6 (d, *J* = 248.6), 197.8; HRMS (ESI+): Found [M+Na]+ 407.1632, Calc. for C23H25FNaO4 407.1635; IR (neat) *ν*max (cm-1): 3561, 3059, 2947, 1662, 1598, 1575, 1457, 1133.

2.4.5. *(4-fluorophenyl)[3-(3,7-dimethyl-2,6-octadienyl)-2,4,6-trihydroxyphenyl]methanone (****8d****)*. Yield=44%; light orange semisolid; TLC Rf 0.55 (Hexanes-EtOAc, 4:1); 1H NMR (400 MHz, CDCl3): *δ* 1.59 (3H, s), 1.65 (3H, s), 1.79 (3H, s), 2.03-2.14 (4H, m), 3.38 (2H, d, *J* = 7.1), 5.04 (1H, t, *J* = 6.9), 5.26 (1H, t, *J* = 7.0), 5.92 (1H, s), 6.26 (1H, bs), 7.14 (2H, m), 7.57 (1H, bs), 7.67 (2H, m), 10.00 (1H, bs). 13C NMR (100 MHz, CDCl3): *δ* 16.3, 17.7, 21.7, 25.6, 26.3, 39.7, 96.2, 104.6, 106.4, 115.7 (d, *J* = 21.9, 2x), 121.3, 122.1, 130.9 (d, *J* = 9.0, 2x), 132.1, 136.4 (d, *J* = 3.4) 139.6, 159.0, 160.6, 162.3, 165.0 (d, *J* = 253.8), 196.7; HRMS (ESI+): Found [M+Na]+ 407.1632, Calc. for C23H25FNaO4 407.1635; IR (neat) *ν*max (cm-1): 3548, 3062, 2946, 1662, 1595, 1572, 1451, 1141.

**2.5. Synthesis of di-*C*-prenylated benzophenones 9a-d, 10c and 10d**

2.5.1. *phenyl[2,4,6-trihydroxy-3-(3-methyl-2-butenyl)phenyl]methanone (****9a****)*. To a mixture of phenyl(2,4,6-trihydroxyphenyl)methanone (0.276 g, 1.2 mmol) and DBU (0.366 g, 2.4 mmol) in dry THF (15 ml) was added a prenyl bromide (0.358 g, 2.4 mmol) in small increments. The temperature of the reaction mixture was increased to 45 ºC and stirred for 24 h. After the temperature of the mixture was reduced to room temperature, a 2 M HCl (20 mL) was added to the mixture, it was stirred for a further 15 min and extracted with EtOAc (4 x 20 mL), washed with brine (20 mL) and dried over anhydrous MgSO4. The removal of the solvent *in vacuo* resulted in a light orange product. After purification by silica gel column chromatography (Hexanes-EtOAc, 4:1), **9a** was obtained as a light orange semisolid (48%); TLC Rf 0.85 (Hexanes-EtOAc, 4:1); 1H NMR (400 MHz, CDCl3): *δ* 1.74 (6H, d, *J* = 1.1), 1.79 (6H, s), 3.34 (4H, d, *J* = 7.1), 5.22 (2H, m), 6.35 (1H, bs), 7.50 (2H, dd, *J* = 8.0, 7.7), 7.57 (1H, tt, *J* = 7.7, 1.5), 7.64 (2H, dd, *J* = 8.0, 1.5), 8.91 (2H, bs). 13C NMR (100 MHz, CDCl3): *δ* 17.6 (2x), 21.8 (2x), 26.0 (2x), 104.6, 106.3 (2x), 121.9 (2x),127.8 (2x), 129.2 (2x), 132.2, 135.4 (2x), 140.0, 157.5 (2x), 161.0, 198.0; HRMS (ESI+): Found [M+Na]+ 389.1723, Calc. for C23H26NaO4 389.1729; IR (neat) *ν*max (cm-1): 3512, 3023, 2942, 1632, 1586, 1566, 1443, 1121.

2.5.2. *(3-fluorophenyl)[2,4,6-trihydroxy-3,5-bis(3-methyl-2-butenyl)phenyl]methanone (****9c****)*. Yield 46%; light orange semisolid; TLC Rf 0.85 (Hexanes-EtOAc, 4:1); 1H NMR (400 MHz, CDCl3): *δ* 1.75 (6H, d, *J* = 1.1), 1.79 (6H, s), 3.35 (4H, d, *J* = 7.1), 5.22 (2H, m), 6.38 (1H, bs), 7.22 (1H, t, *J* = 8.1), 7.31 (1H, m), 7.38-7.47 (2H, m), 8.83 (2H, bs). 13C NMR (100 MHz, CDCl3): *δ* 17.6 (2x), 21.8 (2x), 26.1 (2x), 104.6, 106.1 (2x), 115.2 (d, *J* = 22.9), 118.6 (d, *J* = 21.1), 121.6 (2x), 123.6 (d, *J* = 3.0), 130.3 (d, *J* = 7.4), 135.8 (2x), 142.9 (d, *J* = 6.5), 157.7 (2x), 160.9, 162.5 (d, *J* = 247.9), 197.0; HRMS (ESI+): Found [M+Na]+ 407.1634, Calc. for C23H25FNaO4 407.1635; IR (neat) *ν*max (cm-1): 3524, 3035, 2941, 1653, 1587, 1577, 1431, 1142.

2.5.3. *(4-fluorophenyl)[2,4,6-trihydroxy-3,5-bis(3-methyl-2-butenyl)phenyl]methanone (****9d****)*. Yield 47%; light orange semisolid; TLC Rf 0.85 (Hexanes-EtOAc, 4:1); 1H NMR (400 MHz, CDCl3): *δ* 1.75 (6H, d, *J* = 1.1), 1.79 (6H, s), 3.35 (4H, d, *J* = 7.1), 5.22 (2H, m), 6.34 (1H, bs), 7.14 (2H, m), 7.67 (2H, m), 8.75 (2H, bs). 13C NMR (100 MHz, CDCl3): *δ* 17.9 (2x), 21.9 (2x), 25.8 (2x), 104.7, 106.1 (2x), 115.7 (d, *J* = 21.9, 2x), 121.6 (2x), 130.9 (d, *J* = 9.0, 2x), 135.6 (2x), 136.7 (d, *J* = 3.1), 157.4 (2x), 160.6, 164.9 (d, *J* = 253.6), 196.9; HRMS (ESI-): Found [M-H]- 383.1653, Calc. for C23H24O4F 383.1659; IR (neat) *ν*max (cm-1): 3552, 3046, 2945, 1663, 1596, 1574, 1441, 1145.

2.5.4. *(3-fluorophenyl)[3,5-bis(3,7-dimethyl-2,6-octadienyl)-2,4,6-trihydroxyphenyl]methanone (****10c****)*. Yield=16%; light orange oil; TLC Rf 0.88 (Hexanes-EtOAc, 4:1); 1H NMR (400 MHz, CDCl3): *δ* 1.58 (6H, s), 1.64 (6H, s), 1.78 (6H, s), 2.03-2.15 (8H, m), 3.37 (4H, d, *J* = 6.9), 5.03 (2H, t, *J* = 6.8), 5.23 (2H, t, *J* = 6.9), 6.42 (1H, bs), 7.20 (1H, m), 7.31 (1H, m), 7.38-7.48 (2H, m), 8.86 (2H, bs). 13C NMR (100 MHz, CDCl3): *δ* 16.2 (2x), 17.7 (2x), 21.8 (2x), 25.6 (2x), 26.2 (2x), 39.7 (2x), 104.6, 106.0 (2x), 115.1 (d, *J* = 22.8), 118.4 (d, *J* = 21.1), 121.5 (2x), 123.6 (d, *J* = 3.0), 123.6 (2x), 130.0 (d, *J* = 7.9), 132.1 (2x), 139.7 (2x), 143.1 (d, *J* = 6.6), 157.8 (2x), 160.9, 162.5 (d, *J* = 247.8), 197.2; HRMS (ESI+): Found [M+Na]+ 543.2895, Calc. for C33H41FNaO4 543.2887; IR (neat) *ν*max (cm-1): 3543, 3046, 2936, 1657, 1594, 1586, 1455, 1145.

2.5.5. *(4-fluorophenyl)[3,5-bis(3,7-dimethyl-2,6-octadienyl)-2,4,6-trihydroxyphenyl]methanone (****10d****)*. Yield=16%; light orange oil; TLC Rf 0.88 (Hexanes-EtOAc, 4:1); 1H NMR (400 MHz, CDCl3): *δ* 1.58 (6H, s), 1.64 (6H, s), 1.78 (6H, s), 2.03-2.15 (8H, m), 3.37 (4H, d, *J* = 7.2), 5.03 (2H, t, *J* = 6.9), 5.23 (2H, t, *J* = 7.2), 6.37 (1H, bs), 7.11 (2H, m), 7.67 (2H, m), 8.78 (2H, bs). 13C NMR (100 MHz, CDCl3): *δ* 16.2 (2x), 17.7 (2x), 21.8 (2x), 25.6 (2x), 26.3 (2x), 39.7 (2x), 104.7, 106.0 (2x), 115.5 (d, *J* = 21.9, 2x), 121.6 (2x), 123.6 (2x), 131.0 (d, *J* = 8.9, 2x), 132.1 (2x), 136.9 (d, *J* = 3.2), 139.5 (2x), 157.5 (2x), 160.6, 164.9 (d, *J* = 252.5), 197.1; HRMS (ESI+): Found [M+Na]+ 543.2895, Calc. for C33H41FNaO4 543.2887; IR (neat) *ν*max (cm-1): 3549, 3041, 2929, 1652, 1584, 1589, 1456, 1149.

**2.6. Synthesis of *O*-prenylated benzophenones (11c, 11d, 11d', 12c, 12d and 12d') from mono-prenylated benzophenones**

2.6.1. *(3-fluorophenyl)[2-hydroxy-3-(3-methylbut-2-enyl)-4,6-bis(3-methylbut-2-enyloxy)phenyl]methanone (****11c****)*. A mixture of (3-fluorophenyl)[2,4,6-trihydroxy-3-(3-methyl-2-butenyl)phenyl]methanone (0.1 g, 0.32 mmol), prenyl bromide (0.06 g, 0.38 mmol) and K2CO3 (0.17 g) in dry acetone (10 mL) was refluxed for 2 h. The mixture was allowed to cool before being filtered through a sintered funnel. The filtrate was washed with a minimal amount of water and extracted with EtOAc. The organic layer was dried over MgSO4. After the solvent of the mixture was reduced *in vacuo*, the mixture was purified by column chromatography (hexanes-EtOAc, 1:4) to obtain **11c** (0.10 g, 0.22 mmol, 69%) as light yellow crystals, mp 108-109 °C, TLC Rf 0.82 (Hexanes-EtOAc, 9:1). 1H NMR (400 MHz, CDCl3): *δ* 1.56 (3H, s), 1.63 (3H, s), 1.70 (3H, s), 1.77 (3H, s), 1.79 (3H, s), 1.83 (3H, s), 3.33 (2H, d, *J* = 7.1), 4.21 (2H, d, *J* = 6.7), 4.60 (2H, d, *J* = 6.7), 4.74 (1H, t, *J* = 6.7), 5.26 (1H, t, *J* = 7.1), 5.49 (1H, t, *J* = 6.8), 5.94 (1H, s), 7.09-7.19 (2H, m), 7.27 (1H, d, *J* = 7.8), 7.33 (1H, m), 12.21 (1H, bs). 13C NMR (100 MHz, CDCl3): *δ* 17.7, 17.9, 18.3, 21.6, 25.6, 25.7, 25.8, 65.0, 65.2, 88.7, 105.4, 110.1, 114.3 (d, *J* = 23.3), 116.5 (d, *J* = 21.2), 118.3, 119.4, 122.6, 122.9 (d, *J* = 2.8), 129.2 (d, *J* = 8.0), 131.3, 137.6, 138.1, 144.9 (d, *J* = 7.1), 160.0, 162.3 (d, *J* = 245.5), 162.4, 163.5, 198.3 (d, *J* = 1.9); HRMS (ESI+): Found [M+Na]+ 475.2262, Calc. for C28 H33FNaO4 475.2261.

And *(3-fluorophenyl)[2-hydroxy-3,5-bis(3-methylbut-2-enyl)-4,6-bis(3-methylbut-2-enyloxy)phenyl]methanone (****12c****)* was obtained as a light orange semisolid (0.02 g, 0.038 mmol 15%), TLC Rf 0.90 (Hexanes-EtOAc, 9:1). 1H NMR (400 MHz, CDCl3): *δ* 1.36 (3H, s), 1.59 (3H, s), 1.69 (3H, s), 1.71 (6H, s), 1.73 (3H, s), 1.79 (3H, s), 1.82 (3H, s), 3.31 (2H, d, *J* = 6.4), 3.42 (2H, d, *J* = 6.4), 3.96 (2H, d, *J* = 7.0), 4.39 (2H, d, *J* = 7.0), 4.70 (1H, t, *J* = 7.0), 5.16 (1H, t, *J* = 6.4), 5.27 (1H, t, *J* = 6.4), 5.58 (1H, t, *J* = 7.0), 7.23 (1H, dd, *J* = 9.5, 7.8), 7.39 (1H, m), 7.42 (1H, d, *J* = 9.5), 7.51 (1H, d, *J* = 7.8), 10.88 (1H, bs). 13C NMR (100 MHz, CDCl3): *δ* 17.7, 17.9, 17.9, 18.0, 23.3, 23.4, 25.6, 25.6, 25.7, 25.8, 71.3, 72.7, 110.0, 112.0, 116.3 (d, *J* = 22.8), 118.8 (d, *J* = 21.3), 119.5, 120.4, 121.2, 122.8, 124.0, 125.3 (d, *J* = 2.4), 129.2 (d, *J* = 7.6), 131.3, 132.1, 137.5, 137.5, 141.9 (d, *J* = 6.6), 156.7, 169.3, 162.1 (d, *J* = 248.3), 162.5, 198.1; HRMS (ESI+): Found [M+Na]+ 543.2882, Calc. for C33H41FNaO4 543.2887.

2.6.2. *(4-fluorophenyl)[2-hydroxy-3-(3-methylbut-2-enyl)-4,6-bis(3-methylbut-2-enyloxy)phenyl]methanone (****11d****)*. Yield=65%; light yellow crystals, mp 114-115 °C; TLC Rf 0.67 (Hexanes-EtOAc, 9:1); 1H NMR (400 MHz, CDCl3): *δ* 1.56 (3H, s), 1.64 (3H, s), 1.70 (3H, s), 1.77 (3H, s), 1.79 (3H, s), 1.83 (3H, s), 3.33 (2H, d, *J* = 7.2), 4.22 (2H, d, *J* = 6.6), 4.60 (2H, d, *J* = 6.7), 4.77 (1H, t, *J* = 6.6), 5.26 (1H, t, *J* = 7.2), 5.49 (1H, t, *J* = 6.7), 5.95 (1H, s), 7.04 (2H, m), 7.53 (2H, m), 12.08 (1H, bs). 13C NMR (100 MHz, CDCl3): *δ* 17.7, 17.9, 18.3, 21.6, 25.5, 25.7, 25.8, 65.1, 65.2, 88.9, 105.7, 110.2, 114.4 (d, *J* = 21.9, 2x), 118.6, 119.5, 122.7, 130.0 (d, *J* = 9.1, 2x), 131.2, 137.4, 138.0, 138.7 (d, *J* = 3.0), 159.7, 162.0, 163.1, 164.1 (d, *J* = 263.9), 198.3; HRMS (ESI+): Found [M+Na]+ 475.2263, Calc. for C28H33FNaO4 475.2261.

And *(4-fluorophenyl)[2-hydroxy-3,5-bis(3-methylbut-2-enyl)-4,6-bis(3-methylbut-2-enyloxy)phenyl]methanone* *(****12d****)*. Yield=15%; light orange semisolid, TLC Rf 0.90 (Hexanes-EtOAc, 9:1); 1H NMR (400 MHz, CDCl3): *δ* 1.35 (3H, s), 1.58 (3H, s), 1.67-1.74 (12H, m), 1.79 (3H, s), 1.82 (3H, s), 3.31 (2H, d, *J* = 6.3), 3.41 (2H, d, *J* = 6.6), 3.94 (2H, d, *J* = 7.0), 4.38 (2H, d, *J* = 6.9), 4.70 (1H, t, *J* = 7.0), 5.15 (1H, t, *J* = 6.3), 5.27 (1H, t, *J* = 6.6), 5.58 (1H, t, *J* = 6.9), 7.10 (2H, m), 7.78 (2H, m), 10.81 (1H, bs). 13C NMR (100 MHz, CDCl3): *δ* 17.7, 17.9, 17.9, 18.0, 23.3, 23.4, 25.6, 25.6), 25.7, 25.8, 71.3, 72.5, 112.0, 114.7 (d, *J* = 22.0, 2x), 119.4, 119.5, 120.4, 121.1 122.9, 124.1, 131.2, 132.0, 132.3 (d, *J* = 9.0,2x), 135.7 (d, *J* = 3.0), 137.5, 137.6, 156.5, 159.1, 162.1, 165.2 (d, *J* = 255.0), 197.9; HRMS (ESI+): Found [M+Na]+ 543.2884, Calc. for C33H41FNaO4 543.2887.

2.6.3. *(4-fluorophenyl)[2-hydroxy-3-(3,7-dimethylocta-2,6-dienyl)-4,6-bis(3,7-dimethylocta-2,6-dienyloxy)phenyl] methanone (****11d'****)*. Yield=60%; light orange semisolid; TLC Rf 0.78 (Hexanes-EtOAc, 10:1); 1H NMR (400 MHz, CDCl3): *δ* 1.57 (3H, s), 1.60 (3H, s), 1.61 (3H, s), 1.63 (3H, s), 1.67 (3H, s), 1.70 (3H, s), 1.70 (3H, s), 1.76 (3H, s), 1.79 (3H, s), 1.87-2.05 (4H, m), 2.04-2.20 (8H, m), 3.35 (2H, d, *J* = 7.1), 4.25 (2H, d, *J* = 6.4), 4.62 (2H, d, *J* = 6.4), 4.76 (1H, t, *J* = 6.4), 5.05 (2H, t, *J* = 7.2), 5.08-5.17 (2H, m), 5.27 (1H, t, *J* = 7.1), 5.50 (1H, t, *J* = 6.5), 5.96 (1H, s), 7.04 (2H, m), 7.55 (2H, m), 12.00 (1H, bs). 13C NMR (100 MHz, CDCl3): *δ* 16.1, 16.6, 16.7, 17.6, 17.6, 17.7, 21.6, 25.6, 25.6, 25.6, 26.2, 26.3, 26.8, 39.3, 39.5, 39.9, 65.2, 65.3, 88.9, 105.7, 110.2, 114.4 (d, *J* = 21.6, 2x), 118.2, 119.3, 122.5, 123.7, 123.7, 124.5, 130.1 (d, *J* = 8.5, 2x), 131.1, 131.8, 131.9, 134.7, 138.7 (d, *J* = 3.0,), 140.6, 141.3, 159.7, 162.0, 163.2, 164.2 (d, *J* = 251.9), 198.3; HRMS (ESI+): Found [M+Na]+ 679.4142, Calc. for C43H57FNaO4 679.4141.

And *(4-fluorophenyl)[2-hydroxy-3,5-bis(3,7-dimethylocta-2,6-dienyl)-4,6-bis(3,7-dimethylocta-2,6-dienyloxy)phenyl] methanone (****12d****')*. Yield=12%; light yellow semisolid; TLC Rf 0.87 (Hexanes-EtOAc, 10:1); 1H NMR (400 MHz, CDCl3): *δ* 1.35 (3H, s), 1.59 (6H, s), 1.60 (3H, s), 1.64 (3H, s), 1.65 (6H, s), 1.69 (3H, s), 1.69 (3H, s), 1.72 (3H, s), 1.72 (3H, s), 1.79 (3H, s), 1.82-1.90 (4H, m), 1.92-2.20 (12H, m), 3.33 (2H, d, *J* = 6.2), 3.43 (2H, d, *J* = 6.3), 3.97 (2H, d, *J* = 6.9), 4.41 (2H, d, *J* = 6.6), 4.70 (1H, t, *J* = 6.9), 5.02 (2H, t, *J* = 7.0), 5.05-5.11 (2H, m), 5.11-5.22 (2H, m), 5.29 (1H, t, *J* = 6.4), 5.59 (1H, t, *J* = 6.7), 7.09 (2H, m), 7.78 (2H, m), 10.84 (1H, bs). 13C NMR (100 MHz, CDCl3): *δ* 16.2, 16.3, 16.4, 16.6, 17.6, 17.6, 17.6, 17.7, 23.3, 23.4, 25.6, 25.6, 25.7, 26.2, 26.1, 26.4, 26.7, 26.7, 39.4, 39.6, 39.7, 39.7, 71.3, 72.6, 112.0, 114.7 (d, *J* = 21.9, 2x), 119.0, 119.5, 120.2, 121.1, 122.8, 123.8, 123.9, 124.0, 124.3, 124.3, 131.2, 131.3, 131.7, 131.8, 132.4 (d, *J* = 9.0, 2x), 134.8, 135.6, 135.7 (d, *J* = 3.0), 140.7, 140.8, 156.6, 159.2, 162.2, 165.3 (d, *J* = 251.9), 197.9; HRMS (ESI+): Found [M+Na]+ 815.5397, Calc. for C53H73FNaO4 815.5391.

**2.7. Prenylation of benzophenones under K2CO3 to form 13c, 13d, 13d', 14c, 14d, 14d' and others**

2.7.1. *(3-fluorophenyl)[2-hydroxy-4,6-bis(3-methylbut-2-enyloxy)phenyl]methanone (****13c****)*. A mixture of (3-fluorophenyl)(2,4,6-trihydroxyphenyl)methanone (0.20 g, 0.81 mmol), prenyl bromide (0.48 g, 1.2 mmol) and K2CO3 (0.44 g) in dry acetone (10 mL) was refluxed for 2 h. The mixture was allowed to cool before being filtered through a sintered funnel. The filtrate was washed with a minimal amount of water and extracted with EtOAc. The organic layer was dried over anhydrous MgSO4. After the solvent of the mixture was reduced *in vacuo*, the mixture was purified by column chromatography (Hexanes-EtOAc, 4:1) to obtain **13c** as a cream white semisolid, TLC Rf 0.70 (Hexanes-EtOAc, 9:1). 1H NMR (400 MHz, CDCl3): *δ* 1.54 (3H, s), 1.62 (3H, s), 1.78 (3H, s), 1.83 (3H, s), 4.20 (2H, d, *J* = 6.8), 4.58 (2H, d, *J* = 6.8), 4.73 (1H, t, *J* = 6.8), 5.50 (1H, t, *J* = 6.8), 5.94 (1H, d, *J* = 2.3), 6.17 (1H, d, *J* = 2.3), 7.10-7.18 (2H, m), 7.27 (1H, d, *J* = 7.8), 7.33 (1H, m), 12.37 (1H, bs). 13C NMR (100 MHz, CDCl3): *δ* 17.9, 18.2, 25.5, 25.8, 65.0, 65.2, 92.5, 94.1, 105.4, 114.3 (d, *J* = 22.7), 116.8 (d, *J* = 21.7), 118.0, 118.6, 122.8 (d, *J* = 3.0), 129.2 (d, *J* = 7.6), 137.8, 139.3, 144.5 (d, *J* = 7.1), 161.4, 162.1 (d, *J* = 244.0), 166.2, 166.4, 198.0 (d, *J* = 1.9); HRMS (ESI+): Found [M+Na]+ 407.1642, Calc. for C23H25FNaO4 407.1635.

And *(3-fluorophenyl)[2,4,6-tris(3-methylbut-2-enyloxy) phenyl]methanone (****14c****)*. Light orange semisolid; TLC Rf 0.61 (Hexanes-EtOAc, 9:1). 1H NMR (400 MHz, CDCl3): *δ* 1.57 (6H, s), 1.67 (6H, s), 1.79 (3H, s), 1.84 (3H, s), 4.42 (4H, d, *J* = 6.7), 4.55 (2H, d, *J* = 6.8), 5.20 (2H, t, *J* = 6.7), 5.53 (1H, t, *J* = 6.8), 6.19 (2H, s), 7.21 (1H, t, *J* = 7.8), 7.37 (1H, m), 7.51 (1H, d, *J* = 9.5), 7.61 (1H, d, *J* = 7.8). 13C NMR (100 MHz, CDCl3): *δ* 18.1 (2x), 18.2, 25.6 (2x), 25.8, 64.9, 65.6 (2x), 92.9 (2x), 111.5, 115.9 (d, *J* = 22.1,), 119.3 (d, *J* = 21.3), 119.3, 119.5 (2x), 125.0 (d, *J* = 2.2), 129.6 (d, *J* = 7.6), 137.5 (2x), 138.6, 141.1 (d, *J* = 6.2), 158.2 (2x), 161.6, 162.7 (d, *J* = 253.0), 193.7; HRMS (ESI+): Found [M+Na]+ 475.2267, Calc. for C28H33FNaO4 475.2261.

And **11c** and **12c**.

2.7.2. *(4-fluorophenyl)[2-hydroxy-4,6-bis(3-methylbut-2-enyloxy)phenyl]methanone (****13d****)*. Cream white crystals, mp 86-90 °C; TLC Rf 0.71 (Hexanes-EtOAc, 9:1); 1H NMR (400 MHz, CDCl3): *δ* 1.53 (3H, s), 1.62 (3H, s), 1.77 (3H, s), 1.83 (3H, s), 4.21 (2H, d, *J* = 6.7), 4.56 (2H, d, *J* = 6.7), 4.75 (1H, t, *J* = 6.7), 5.49 (1H, t, *J* = 6.7), 5.94 (1H, d, *J* = 2.4), 6.18 (1H, d, *J* = 2.4), 7.04 (2H, m), 7.51 (2H, m), 12.19 (1H, bs). 13C NMR (100 MHz, CDCl3): *δ* 17.9, 18.2, 25.5, 25.8, 65.0, 65.2, 92.5, 94.2, 105.6, 114.4(d, *J* = 21.9, 2x), 118.2, 118.7, 130.0 (d, *J* = 9.1, 2x), 137.6, 138.4 (d, *J* = 3.0), 139.3, 161.1, 164.2 (d, *J* = 250.0), 165.8, 166.0, 198.0; HRMS (ESI+): Found [M+Na]+ 407.1640, Calc. for C23H25FNaO4 407.1635.

And *(4-fluorophenyl)[2-hydroxy-5-(3-methylbut-2-enyl)-4,6-bis(3-methylbut-2-enyloxy)phenyl]methanone (****14d****)*. Light orange semisolid, TLC Rf 0.43 (Hexanes-EtOAc, 9:1). 1H NMR (400 MHz, CDCl3): *δ* 1.59 (6H, s), 1.67 (3H, s), 1.68 (3H, s), 1.79 (3H, s), 1.83 (3H, s), 3.39-4.46 (4H, m), 4.64 (2H, d, *J* = 6.6), 5.18 (1H, t, *J* = 6.5), 5.33 (1H, t, *J* = 7.3), 5.53 (1H, t, *J* = 6.6), 6.38 (1H, s), 7.04 (2H, m), 7.83 (2H, m). 13C NMR (100 MHz, CDCl3): *δ* 17.9, 18.1, 18.4, 25.6, 25.7, 25.8, 66.0, 66.6, 71.7, 95.7, 99.5, 115.4 (d, *J* = 22.2, 2x), 118.0, 119.1, 119.1, 119.5, 132.1 (d, *J* = 9.6, 2x), 134.6 (d, *J* = 3.0), 138.0, 138.5, 139.1, 155.1, 156.5, 157.6, 165.8 (d, *J* = 254.4), 192.4; HRMS (ESI+): Found [M+Na]+ 475.2265, Calc. for C28H33FNaO4 475.2261.

And **11d** and **12d**.

2.7.3. *(4-fluorophenyl)[2-hydroxy-4,6-bis(3,7-dimethylocta-2,6-dienyloxy)phenyl] methanone (****13d'****)*. Light orange oil; TLC Rf 0.63 (Hexanes-EtOAc, 1:10); 1H NMR (400 MHz, CDCl3): *δ* 1.55 (3H, s), 1.61 (3H, s), 1.63 (3H, s), 1.70 (3H, s), 1.70 (3H, s), 1.77 (3H, s), 1.85-2.05 (4H, m), 2.07-2.20 (4H, m), 4.25 (2H, d, *J* = 6.4), 4.60 (2H, d, *J* = 6.6), 4.76 (1H, t, *J* = 6.5), 5.04 (2H, t, *J* = 6.9), 5.12 (1H, t, *J* = 6.5), 5.50 (1H, t, *J* = 6.6), 5.95 (1H, s), 6.17 (1H, s), 7.04 (2H, m), 7.54 (2H, m), 10.18 (1H, bs). 13C NMR (100 MHz, CDCl3): *δ* 16.6, 16.7, 17.6, 17.7, 25.7, 25.7, 26.1, 26.3, 39.2, 39.5, 65.2, 65.3, 92.6, 94.2, 105.6, 114.5 (d, *J* = 21.3, 2x), 117.8, 118.4, 123.7, 123.7, 130.1 (d, *J* = 9.1, 2x), 131.8, 131.9, 138.4 (d, *J* = 3.5), 140.8, 142.3, 161.1, 164.4 (d, *J* = 250.0), 168.5, 166.0, 198.0; HRMS (ESI+): Found [M+Na]+ 543.2878, Calc. for C33H41FNaO4 543.2887.

And *(4-fluorophenyl)[2,4,6-tris(3,7-dimethylocta-2,6-dienyloxy)phenyl]methanone (****14d'****)*. Light orange oil; TLC Rf 0.57 (Hexanes-EtOAc, 1:10); 1H NMR (400 MHz, CDCl3): *δ* 1.58 (6H, s), 1.58 (6H, s), 1.64 (3H, s), 1.66 (6H, s), 1.70 (3H, s), 1.78 (3H, s), 1.81-1.90 (8H, m), 1.98-2.06 (4H, m), 4.45 (4H, d, *J* = 6.3), 4.57 (2H, d, *J* = 6.6), 5.03 (2H, t, *J* = 6.2), 5.13 (1H, t, *J* = 6.1), 5.21 (2H, t, *J* = 6.3), 5.52 (1H, t, *J* = 6.6), 6.19 (2H, s), 7.06 (2H, m), 7.85 (2H, m). 13C NMR (100 MHz, CDCl3): *δ* 16.5, 16.7 (2x), 17.6 (2x), 17.7, 25.6 (2x), 25.7, 26.2 (2x), 26.3, 39.4 (2x), 39.6, 65.0, 65.7 (2x), 92.9 (2x), 110.3, 114.1 (d, *J* = 21.6, 2x), 119.1, 119.4 (2x), 123.7 (2x), 123.7, 131.7 (2x), 131.9, 131.9 (d, *J* = 9.4, 2x), 135.3 (d, *J* = 2.7), 140.5 (C-2x), 141.6, 158.0 (2x), 161.5, 166.2 (d, *J* = 253.3), 193.5; HRMS (ESI+): Found [M+Na]+ 679.4142, Calc. for C43H57FNaO4 679.4139.

And **11d'** and **12d'**.

1H and 13C NMR spectra of Phenyl[2,4,6-trihydroxy-3-(3-methyl-2-butenyl)phenyl] methanone (**7a**).

1H and 13C NMR spectra of (3-fluorophenyl)[2,4,6-trihydroxy-3-(3-methyl-2-butenyl)phenyl]methanone (**7c**)

1H and 13C NMR spectra of (4-fluorophenyl)[2,4,6-trihydroxy-3-(3-methyl-2-butenyl)phenyl]methanone (**7d**).

1H and 13C NMR spectra of Phenyl[3-(3,7-dimethyl-2,6-octadienyl)-2,4,6-trihydroxyphenyl]methanone (**8a**).

1H and 13C NMR spectra of (3-fluorophenyl)[3-(3,7-dimethyl-2,6-octadienyl)-2,4,6-trihydroxyphenyl]methanone (**8c**).

1H and 13C NMR spectra of (4-fluorophenyl)[3-(3,7-dimethyl-2,6-octadienyl)-2,4,6-trihydroxyphenyl]methanone (**8d**).

1H and 13C NMR spectra of phenyl[2,4,6-trihydroxy-3-(3-methyl-2-butenyl)phenyl]methanone (**9a**).

1H and 13C NMR spectra of (3-fluorophenyl)[2,4,6-trihydroxy-3,5-bis(3-methyl-2-butenyl)phenyl]methanone (**9c**).

1H and 13C NMR spectra of (4-fluorophenyl)[2,4,6-trihydroxy-3,5-bis(3-methyl-2-butenyl)phenyl]methanone (**9d**).

1H and 13C NMR spectra of (3-fluorophenyl)[3,5-bis(3,7-dimethyl-2,6-octadienyl)-2,4,6-trihydroxyphenyl]methanone (**10c**).

1H and 13C NMR spectra of (4-fluorophenyl)[3,5-bis(3,7-dimethyl-2,6-octadienyl)-2,4,6-trihydroxyphenyl]methanone (**10d**).

1H and 13C NMR spectra of (3-fluorophenyl)[2-hydroxy-3-(3-methylbut-2-enyl)-4,6-bis(3-methylbut-2-enyloxy)phenyl]methanone (**11c**).

1H and 13C NMR spectra of (3-fluorophenyl)[2-hydroxy-3,5-bis(3-methylbut-2-enyl)-4,6-bis(3-methylbut-2-enyloxy)phenyl]methanone (**12c**)

1H and 13C NMR spectra of (4-fluorophenyl)[2-hydroxy-3-(3-methylbut-2-enyl)-4,6-bis(3-methylbut-2-enyloxy)phenyl]methanone (**11d**).

1H and 13C NMR spectra of (4-fluorophenyl)[2-hydroxy-3,5-bis(3-methylbut-2-enyl)-4,6-bis(3-methylbut-2-enyloxy)phenyl]methanone (**12d**).

1H and 13C NMR spectra of (4-fluorophenyl)[2-hydroxy-3-(3,7-dimethylocta-2,6-dienyl)-4,6-bis(3,7-dimethylocta-2,6-dienyloxy)phenyl] methanone (**11d'**).

1H and 13C NMR spectra of (4-fluorophenyl)[2-hydroxy-3,5-bis(3,7-dimethylocta-2,6-dienyl)-4,6-bis(3,7-dimethylocta-2,6-dienyloxy)phenyl] methanone (**12d'**).

1H and 13C NMR spectra of (3-fluorophenyl)[2-hydroxy-4,6-bis(3-methylbut-2-enyloxy)phenyl]methanone (**13c**).

1H and 13C NMR spectra of (3-fluorophenyl)[2,4,6-tris(3-methylbut-2-enyloxy) phenyl]methanone (**14c**).

1H and 13C NMR spectra of (4-fluorophenyl)[2-hydroxy-4,6-bis(3-methylbut-2-enyloxy)phenyl]methanone (**13d**).

1H and 13C NMR spectra of (4-fluorophenyl)[2-hydroxy-5-(3-methylbut-2-enyl)-4,6-bis(3-methylbut-2-enyloxy)phenyl]methanone (**14d**).

1H NMR spectra of (4-fluorophenyl)[2-hydroxy-4,6-bis(3,7-dimethylocta-2,6-dienyloxy)phenyl]methanone (**13d'**).

1H and 13C NMR spectra of (4-fluorophenyl)[2,4,6-tris(3,7-dimethylocta-2,6-dienyloxy)phenyl]methanone (**14d'**).
